# Supplementary material for: Environmental perturbations lead to extensive directional shifts in RNA processing
Source: PubMed Central journal article supplement (PMC5667937; doi:10.1371/journal.pgen.1006995), 2017-10-12
Supplement: pgen.1006995.s001.pdf [file pgen.1006995.s001.pdf]

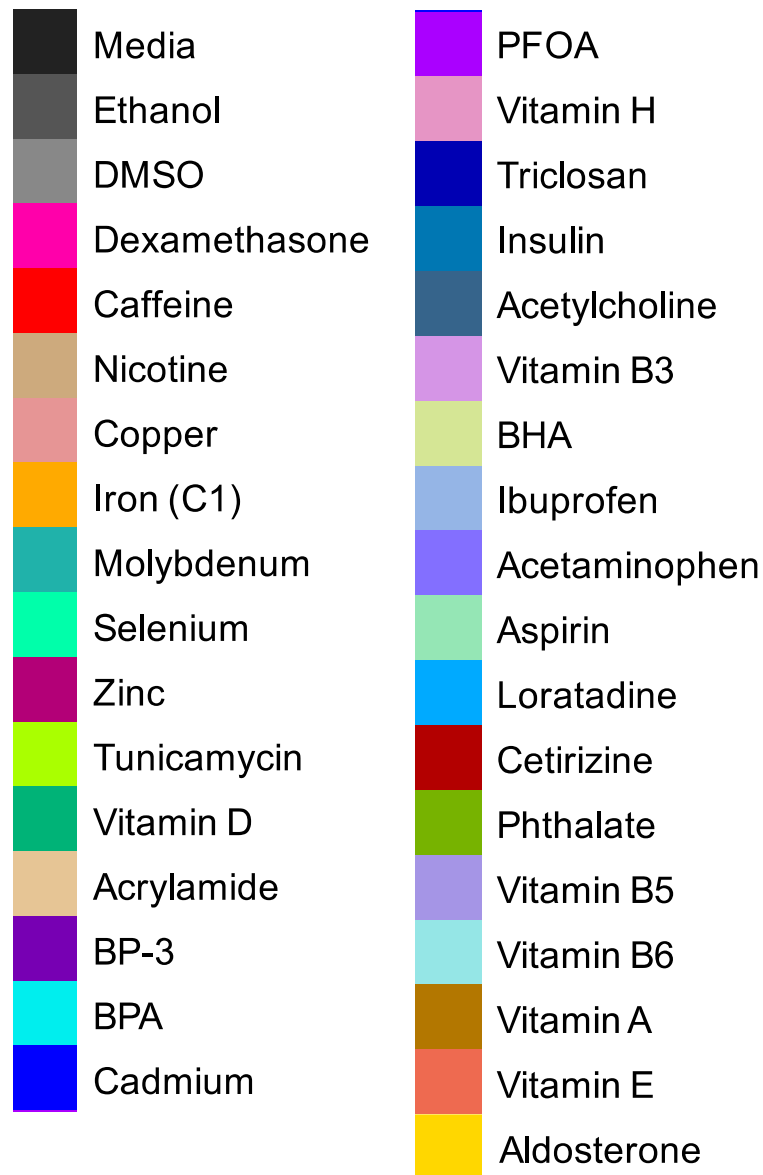

**S1 Fig. Color legend for treatments.**

This is a figure depicting the colors that are used to denote each of the 32 treatments throughout the manuscript.
