# Supplementary material for: Environmental perturbations lead to extensive directional shifts in RNA processing
Source: PubMed Central journal article supplement (PMC5667937; doi:10.1371/journal.pgen.1006995), 2017-10-12
Supplement: pgen.1006995.s008.pdf [file pgen.1006995.s008.pdf]

| Subcategory                                                           | Alternative Subcategory Name | Expected | Observed | p-value (FDR) | Enrichment |
|-----------------------------------------------------------------------|------------------------------|----------|----------|---------------|------------|
| intracellular                                                         | GO:0005622                   | 2288.25  | 2442     | 9.60E-12      | up         |
| nucleus                                                               | GO:0005634                   | 1082.89  | 1244     | 1.26E-10      | up         |
| intracellular part                                                    | GO:0044424                   | 2224.95  | 2373     | 1.40E-10      | up         |
| organelle                                                             | GO:0043226                   | 1905.38  | 2061     | 5.47E-10      | up         |
| intracellular organelle                                               | GO:0043229                   | 1902.97  | 2059     | 5.47E-10      | up         |
| RNA binding                                                           | GO:0003723                   | 175.093  | 246      | 1.20E-08      | up         |
| protein binding                                                       | GO:0005515                   | 1686.26  | 1834     | 1.33E-08      | up         |
| nucleobase, nucleoside, nucleotide and nucleic acid metabolic process | GO:0006139                   | 875.12   | 1006     | 4.37E-08      | up         |
| membrane-bounded organelle                                            | GO:0043227                   | 1738.54  | 1877     | 1.39E-07      | up         |
| intracellular membrane-bounded organelle                              | GO:0043231                   | 1737.17  | 1875     | 1.53E-07      | up         |
| organelle organization                                                | GO:0006996                   | 339.866  | 428      | 1.63E-07      | up         |
| cellular metabolic process                                            | GO:0044237                   | 1518.39  | 1657     | 1.63E-07      | up         |
| cellular nitrogen compound metabolic process                          | GO:0034641                   | 929.127  | 1054     | 3.35E-07      | up         |
| cellular macromolecule metabolic process                              | GO:0044260                   | 1191.59  | 1324     | 3.35E-07      | up         |
| cellular process                                                      | GO:0009987                   | 2252.47  | 2371     | 3.88E-07      | up         |
| gene expression                                                       | GO:0010467                   | 764.01   | 880      | 4.85E-07      | up         |
| cellular component organization                                       | GO:0016043                   | 603.709  | 706      | 2.06E-06      | up         |
| nitrogen compound metabolic process                                   | GO:0006807                   | 947.703  | 1064     | 3.35E-06      | up         |
| intracellular organelle part                                          | GO:0044446                   | 1079.8   | 1200     | 3.35E-06      | up         |
| organelle part                                                        | GO:0044422                   | 1092.18  | 1212     | 3.72E-06      | up         |
| nucleic acid binding                                                  | GO:0003676                   | 624.693  | 723      | 8.76E-06      | up         |
| binding                                                               | GO:0005488                   | 2363.58  | 2465     | 9.86E-06      | up         |
| nucleic acid metabolic process                                        | GO:0090304                   | 761.946  | 863      | 2.62E-05      | up         |
| regulation of cellular metabolic process                              | GO:0031323                   | 715.163  | 812      | 4.49E-05      | up         |
| regulation of primary metabolic process                               | GO:0080090                   | 680.764  | 775      | 5.46E-05      | up         |
| regulation of metabolic process                                       | GO:0019222                   | 753.002  | 850      | 6.06E-05      | up         |
| nucleotide binding                                                    | GO:0000166                   | 497.071  | 580      | 6.66E-05      | up         |
| nuclear part                                                          | GO:0044428                   | 473.335  | 554      | 7.94E-05      | up         |
| cytoplasm                                                             | GO:0005737                   | 1629.84  | 1740     | 8.22E-05      | up         |
| regulation of macromolecule metabolic process                         | GO:0060255                   | 661.5    | 752      | 9.97E-05      | up         |
| macromolecule metabolic process                                       | GO:0043170                   | 1283.1   | 1390     | 0.000125      | up         |
| non-membrane-bounded organelle                                        | GO:0043228                   | 565.87   | 650      | 0.000134      | up         |
| intracellular non-membrane-bounded organelle                          | GO:0043232                   | 565.87   | 650      | 0.000134      | up         |
| primary metabolic process                                             | GO:0044238                   | 1537.65  | 1645     | 0.000141      | up         |
| cellular biosynthetic process                                         | GO:0044249                   | 851.041  | 946      | 0.000198      | up         |

| Subcategory                                                                         | Alternative Subcategory Name | Expected | Observed | p-value (FDR) | Enrichment |
|-------------------------------------------------------------------------------------|------------------------------|----------|----------|---------------|------------|
| cellular macromolecule biosynthetic process                                         | GO:0034645                   | 697.619  | 784      | 0.000377      | up         |
| regulation of cellular protein metabolic process                                    | GO:0032268                   | 132.438  | 175      | 0.000379      | up         |
| biosynthetic process                                                                | GO:0009058                   | 869.616  | 961      | 0.000478      | up         |
| cellular protein metabolic process                                                  | GO:0044267                   | 563.806  | 642      | 0.000535      | up         |
| posttranscriptional regulation of gene expression                                   | GO:0010608                   | 55.383   | 83       | 0.000547      | up         |
| metabolic process                                                                   | GO:0008152                   | 1674.22  | 1773     | 0.000639      | up         |
| histone deacetylation                                                               | GO:0016575                   | 5.84789  | 15       | 0.000751      | up         |
| chromatin organization                                                              | GO:0006325                   | 90.8144  | 125      | 0.000767      | up         |
| macromolecule biosynthetic process                                                  | GO:0009059                   | 710.347  | 793      | 0.000846      | up         |
| regulation of gene expression                                                       | GO:0010468                   | 560.71   | 636      | 0.000961      | up         |
| transcription factor binding                                                        | GO:0008134                   | 123.494  | 162      | 0.001161      | up         |
| translation                                                                         | GO:0006412                   | 97.0062  | 131      | 0.001395      | up         |
| chromosome organization                                                             | GO:0051276                   | 122.118  | 160      | 0.001395      | up         |
| response to stress                                                                  | GO:0006950                   | 364.977  | 426      | 0.001729      | up         |
| regulation of protein metabolic process                                             | GO:0051246                   | 149.981  | 191      | 0.001729      | up         |
| regulation of protein ubiquitination                                                | GO:0031396                   | 33.7114  | 54       | 0.001759      | up         |
| regulation of organic acid transport                                                | GO:0032890                   | 3.43994  | 10       | 0.002049      | up         |
| cell death                                                                          | GO:0008219                   | 270.723  | 323      | 0.002405      | up         |
| negative regulation of metabolic process                                            | GO:0009892                   | 184.037  | 228      | 0.002405      | up         |
| death                                                                               | GO:0016265                   | 270.723  | 323      | 0.002405      | up         |
| chromatin modification                                                              | GO:0016568                   | 81.8705  | 112      | 0.002433      | up         |
| cell cycle                                                                          | GO:0007049                   | 238.732  | 288      | 0.002436      | up         |
| negative regulation of macromolecule metabolic process                              | GO:0010605                   | 173.373  | 216      | 0.002436      | up         |
| regulation of nitrogen compound metabolic process                                   | GO:0051171                   | 568.278  | 639      | 0.002482      | up         |
| regulation of cellular process                                                      | GO:0050794                   | 1204.67  | 1293     | 0.002509      | up         |
| negative regulation of protein ubiquitination                                       | GO:0031397                   | 22.7036  | 39       | 0.002558      | up         |
| regulation of nucleobase, nucleoside, nucleotide and nucleic acid metabolic process | GO:0019219                   | 563.806  | 633      | 0.003159      | up         |
| regulation of biological process                                                    | GO:0050789                   | 1263.49  | 1351     | 0.003159      | up         |
| protein amino acid deacetylation                                                    | GO:0006476                   | 7.56786  | 17       | 0.003473      | up         |
| nuclear lumen                                                                       | GO:0031981                   | 371.169  | 429      | 0.003671      | up         |
| transcription regulator activity                                                    | GO:0030528                   | 281.731  | 333      | 0.003717      | up         |
| regulation of macromolecule biosynthetic process                                    | GO:0010556                   | 543.854  | 611      | 0.003888      | up         |
| cytosol                                                                             | GO:0005829                   | 315.442  | 369      | 0.003956      | up         |

| Subcategory                                                | Alternative Subcategory Name | Expected | Observed | p-value (FDR) | Enrichment |
|------------------------------------------------------------|------------------------------|----------|----------|---------------|------------|
| heterogeneous nuclear ribonucleoprotein complex            | GO:0030530                   | 4.12793  | 11       | 0.004376      | up         |
| molecular_function                                         | GO:0003674                   | 2764.68  | 2817     | 0.00461       | up         |
| chromosome                                                 | GO:0005694                   | 112.83   | 146      | 0.00461       | up         |
| translational elongation                                   | GO:0006414                   | 24.7676  | 41       | 0.00461       | up         |
| lysine N-methyltransferase activity                        | GO:0016278                   | 11.0078  | 22       | 0.00473       | up         |
| protein-lysine N-methyltransferase activity                | GO:0016279                   | 11.0078  | 22       | 0.00473       | up         |
| histone-lysine N-methyltransferase activity                | GO:0018024                   | 11.0078  | 22       | 0.00473       | up         |
| regulation of biosynthetic process                         | GO:0009889                   | 563.462  | 630      | 0.004935      | up         |
| RNA processing                                             | GO:0006396                   | 145.165  | 182      | 0.005224      | up         |
| regulation of cellular biosynthetic process                | GO:0031326                   | 560.022  | 626      | 0.005288      | up         |
| biological regulation                                      | GO:0065007                   | 1328.16  | 1411     | 0.006572      | up         |
| regulation of translation                                  | GO:0006417                   | 33.0234  | 51       | 0.006864      | up         |
| cell cycle process                                         | GO:0022402                   | 160.301  | 198      | 0.006872      | up         |
| transcription cofactor activity                            | GO:0003712                   | 84.9665  | 113      | 0.006881      | up         |
| programmed cell death                                      | GO:0012501                   | 249.051  | 295      | 0.006889      | up         |
| mRNA binding                                               | GO:0003729                   | 14.7917  | 27       | 0.007265      | up         |
| double-stranded RNA binding                                | GO:0003725                   | 8.59984  | 18       | 0.007548      | up         |
| apoptosis                                                  | GO:0006915                   | 246.644  | 292      | 0.007548      | up         |
| histone methyltransferase activity                         | GO:0042054                   | 12.7278  | 24       | 0.00798       | up         |
| positive regulation of cellular process                    | GO:0048522                   | 417.952  | 474      | 0.009184      | up         |
| nucleobase, nucleoside and nucleotide metabolic process    | GO:0055086                   | 113.862  | 145      | 0.009987      | up         |
| protein methyltransferase activity                         | GO:0008276                   | 16.5117  | 29       | 0.010365      | up         |
| negative regulation of cellular process                    | GO:0048523                   | 378.049  | 431      | 0.010921      | up         |
| covalent chromatin modification                            | GO:0016569                   | 45.0632  | 65       | 0.011098      | up         |
| negative regulation of cellular metabolic process          | GO:0031324                   | 168.213  | 205      | 0.011541      | up         |
| regulation of cell cycle                                   | GO:0051726                   | 106.294  | 136      | 0.011616      | up         |
| histone modification                                       | GO:0016570                   | 44.3752  | 64       | 0.012068      | up         |
| biological_process                                         | GO:0008150                   | 2579.95  | 2638     | 0.012605      | up         |
| cellular response to stimulus                              | GO:0051716                   | 235.636  | 278      | 0.012917      | up         |
| response to protein stimulus                               | GO:0051789                   | 25.1115  | 40       | 0.012917      | up         |
| cytoskeleton organization                                  | GO:0007010                   | 117.302  | 148      | 0.013022      | up         |
| proteolysis involved in cellular protein catabolic process | GO:0051603                   | 85.6544  | 112      | 0.013917      | up         |
| nucleoside phosphate metabolic process                     | GO:0006753                   | 108.702  | 138      | 0.014617      | up         |
| nucleotide metabolic process                               | GO:0009117                   | 108.702  | 138      | 0.014617      | up         |
| protein metabolic process                                  | GO:0019538                   | 638.108  | 701      | 0.015009      | up         |

| Subcategory                                                  | Alternative Subcategory Name | Expected | Observed | p-value (FDR) | Enrichment |
|--------------------------------------------------------------|------------------------------|----------|----------|---------------|------------|
| protein metabolic process                                    | GO:0019538                   | 638.108  | 701      | 0.015009      | up         |
| regulation of cellular catabolic process                     | GO:0031329                   | 52.2871  | 73       | 0.015009      | up         |
| cellular response to stress                                  | GO:0033554                   | 166.493  | 202      | 0.015062      | up         |
| negative regulation of biological process                    | GO:0048519                   | 407.289  | 460      | 0.015062      | up         |
| positive regulation of biological process                    | GO:0048518                   | 453.04   | 508      | 0.015159      | up         |
| ubiquitin-dependent protein catabolic process                | GO:0006511                   | 74.6466  | 99       | 0.015353      | up         |
| membrane organization                                        | GO:0061024                   | 95.6303  | 123      | 0.015353      | up         |
| cellular protein catabolic process                           | GO:0044257                   | 85.9984  | 112      | 0.015415      | up         |
| transcription activator activity                             | GO:0016563                   | 96.6622  | 124      | 0.016192      | up         |
| proteasomal ubiquitin-dependent protein catabolic process    | GO:0043161                   | 43.3432  | 62       | 0.016858      | up         |
| methyltransferase complex                                    | GO:0034708                   | 14.7917  | 26       | 0.01719       | up         |
| histone methyltransferase complex                            | GO:0035097                   | 14.7917  | 26       | 0.01719       | up         |
| chromatin remodeling                                         | GO:0006338                   | 14.1037  | 25       | 0.018331      | up         |
| cellular membrane organization                               | GO:0016044                   | 95.2863  | 122      | 0.01881       | up         |
| proteasomal protein catabolic process                        | GO:0010498                   | 44.3752  | 63       | 0.018917      | up         |
| mRNA processing                                              | GO:0006397                   | 80.4945  | 105      | 0.020165      | up         |
| transcription                                                | GO:0006350                   | 518.055  | 574      | 0.020779      | up         |
| ribonucleotide binding                                       | GO:0032553                   | 407.289  | 458      | 0.020779      | up         |
| purine ribonucleotide binding                                | GO:0032555                   | 407.289  | 458      | 0.020779      | up         |
| cytoskeletal part                                            | GO:0044430                   | 187.821  | 224      | 0.020779      | up         |
| response to biotic stimulus                                  | GO:0009607                   | 78.0866  | 102      | 0.021864      | up         |
| purine nucleotide binding                                    | GO:0017076                   | 423.8    | 475      | 0.021992      | up         |
| chromosomal part                                             | GO:0044427                   | 92.1903  | 118      | 0.021992      | up         |
| RNA metabolic process                                        | GO:0016070                   | 516.679  | 572      | 0.02208       | up         |
| transcription repressor activity                             | GO:0016564                   | 71.2067  | 94       | 0.02208       | up         |
| ribonucleoprotein complex                                    | GO:0030529                   | 123.494  | 153      | 0.02208       | up         |
| cytoplasmic part                                             | GO:0044444                   | 1116.26  | 1187     | 0.02208       | up         |
| modification-dependent protein catabolic process             | GO:0019941                   | 75.6786  | 99       | 0.022912      | up         |
| protein catabolic process                                    | GO:0030163                   | 97.6942  | 124      | 0.022912      | up         |
| modification-dependent macromolecule catabolic process       | GO:0043632                   | 75.6786  | 99       | 0.022912      | up         |
| protein modification by small protein conjugation or removal | GO:0070647                   | 91.5023  | 117      | 0.022912      | up         |
| negative regulation of ligase activity                       | GO:0051352                   | 18.9197  | 31       | 0.023935      | up         |
| negative regulation of ubiquitin-protein ligase activity     | GO:0051444                   | 18.9197  | 31       | 0.023935      | up         |
| organelle lumen                                              | GO:0043233                   | 452.352  | 504      | 0.024747      | up         |

| Subcategory                                                                             | Alternative Subcategory Name | Expected | Observed | p-value (FDR) | Enrichment |
|-----------------------------------------------------------------------------------------|------------------------------|----------|----------|---------------|------------|
| histone deacetylase activity                                                            | GO:0004407                   | 4.12793  | 10       | 0.02505       | up         |
| protein deacetylase activity                                                            | GO:0033558                   | 4.12793  | 10       | 0.02505       | up         |
| response to unfolded protein                                                            | GO:0006986                   | 14.4477  | 25       | 0.02556       | up         |
| nucleoplasm                                                                             | GO:0005654                   | 237.356  | 276      | 0.027426      | up         |
| regulation of transcription                                                             | GO:0045449                   | 493.287  | 546      | 0.027426      | up         |
| negative regulation of ubiquitin-protein ligase activity involved in mitotic cell cycle | GO:0051436                   | 17.5437  | 29       | 0.027426      | up         |
| regulation of catabolic process                                                         | GO:0009894                   | 60.5429  | 81       | 0.027878      | up         |
| regulation of intracellular protein kinase cascade                                      | GO:0010627                   | 73.6147  | 96       | 0.028092      | up         |
| protein ubiquitination                                                                  | GO:0016567                   | 73.6147  | 96       | 0.028092      | up         |
| M phase of mitotic cell cycle                                                           | GO:0000087                   | 71.8947  | 94       | 0.028269      | up         |
| macromolecular complex                                                                  | GO:0032991                   | 672.164  | 731      | 0.028269      | up         |
| N-methyltransferase activity                                                            | GO:0008170                   | 16.8557  | 28       | 0.02864       | up         |
| organelle fission                                                                       | GO:0048285                   | 72.9267  | 95       | 0.030187      | up         |
| macromolecule modification                                                              | GO:0043412                   | 425.176  | 474      | 0.030826      | up         |
| mRNA metabolic process                                                                  | GO:0016071                   | 95.9743  | 121      | 0.030859      | up         |
| Golgi apparatus                                                                         | GO:0005794                   | 191.605  | 226      | 0.031185      | up         |
| post-translational protein modification                                                 | GO:0043687                   | 351.218  | 396      | 0.032351      | up         |
| positive regulation of cellular metabolic process                                       | GO:0031325                   | 199.172  | 234      | 0.032496      | up         |
| nuclear division                                                                        | GO:0000280                   | 70.5187  | 92       | 0.032634      | up         |
| mitosis                                                                                 | GO:0007067                   | 70.5187  | 92       | 0.032634      | up         |
| RNA splicing                                                                            | GO:0008380                   | 76.7106  | 99       | 0.033302      | up         |
| nucleoside-triphosphatase regulator activity                                            | GO:0060589                   | 106.982  | 133      | 0.033302      | up         |
| intracellular organelle lumen                                                           | GO:0070013                   | 445.816  | 495      | 0.033302      | up         |
| polysome                                                                                | GO:0005844                   | 3.09594  | 8        | 0.036019      | up         |
| regulation of ligase activity                                                           | GO:0051340                   | 23.3916  | 36       | 0.036302      | up         |
| mitotic cell cycle                                                                      | GO:0000278                   | 123.494  | 151      | 0.036472      | up         |
| membrane-enclosed lumen                                                                 | GO:0031974                   | 458.888  | 508      | 0.036817      | up         |
| ATP binding                                                                             | GO:0005524                   | 338.834  | 382      | 0.037558      | up         |
| melanosome                                                                              | GO:0042470                   | 27.5195  | 41       | 0.038419      | up         |
| pigment granule                                                                         | GO:0048770                   | 27.5195  | 41       | 0.038419      | up         |
| regulation of molecular function                                                        | GO:0065009                   | 223.252  | 259      | 0.038419      | up         |
| M phase                                                                                 | GO:0000279                   | 95.9743  | 120      | 0.040551      | up         |
| GTPase regulator activity                                                               | GO:0030695                   | 104.918  | 130      | 0.040551      | up         |
| regulation of catalytic activity                                                        | GO:0050790                   | 185.413  | 218      | 0.040551      | up         |

| Subcategory                        | Alternative Subcategory Name | Expected | Observed | p-value (FDR) | Enrichment |
|------------------------------------|------------------------------|----------|----------|---------------|------------|
| response to stimulus               | GO:0050896                   | 606.117  | 660      | 0.040551      | up         |
| adenyl ribonucleotide binding      | GO:0032559                   | 343.306  | 386      | 0.041464      | up         |
| microtubule organizing center      | GO:0005815                   | 71.2067  | 92       | 0.041957      | up         |
| muscle tissue development          | GO:0060537                   | 32.6794  | 47       | 0.04449       | up         |
| striated muscle tissue development | GO:0014706                   | 30.2715  | 44       | 0.046665      | up         |
| adenyl nucleotide binding          | GO:0030554                   | 359.129  | 402      | 0.046665      | up         |
| nuclear speck                      | GO:0016607                   | 31.9914  | 46       | 0.048643      | up         |

**S3 Table. Gene Ontology of Events that Significantly Shift Following Environmental Perturbation.**

Genes that contained events that shifted in at least one environment were compared to all genes that were tested for an RNA processing event shift. Analysis was performed using GeneTrail [41].
