# Supplementary material for: Environmental perturbations lead to extensive directional shifts in RNA processing
Source: PubMed Central journal article supplement (PMC5667937; doi:10.1371/journal.pgen.1006995), 2017-10-12
Supplement: pgen.1006995.s009.pdf [file pgen.1006995.s009.pdf]

| Treatment  | Spearman's $\rho$ | p-value  | Type      |
|------------|-------------------|----------|-----------|
| Vitamin D  | 0.146             | 0.0069   | RI        |
| Loratadine | 0.2513            | 0.0308   | RI        |
| Aspirin    | -0.1883           | 0.0421   | AFE       |
| Copper     | -0.2606           | 5.00E-04 | AFE       |
| Caffeine   | -0.22             | 3.00E-04 | AFE       |
| Selenium   | -0.0861           | 0.0336   | AFE       |
| Cadmium    | -0.206            | 0.0187   | AFE       |
| Iron       | -0.3228           | 1.00E-04 | AFE       |
| Vitamin B3 | -0.4707           | 0.0029   | AFE       |
| Vitamin H  | -0.3888           | 0.0144   | AFE       |
| Selenium   | -0.1817           | 1.00E-04 | ALE       |
| Loratadine | 0.1781            | 0.0469   | ALE       |
| Iron       | 0.2711            | 0.0022   | ALE       |
| Vitamin D  | 0.2114            | < 0.001  | SE        |
| Selenium   | -0.3211           | 0.0149   | TandemUTR |

**S4 Table. Table of Correlation between Differential Gene Expression and Differential RNA Processing.**

Spearman's correlations were calculated between log-fold change in gene expression and  $\Delta\Psi$  for genes containing significant shifts in RNA processing. Only treatments with  $p$ -value < 0.05 are reported here.
