# Supplementary material for: Environmental perturbations lead to extensive directional shifts in RNA processing
Source: PubMed Central journal article supplement (PMC5667937; doi:10.1371/journal.pgen.1006995), 2017-10-12
Supplement: pgen.1006995.s010.pdf [file pgen.1006995.s010.pdf]

| Splicing Factor | Gene Symbol | BH FDR   | Spearman's $\rho$ | Splice Type |
|-----------------|-------------|----------|-------------------|-------------|
| ENSG00000075292 | ZNF638      | 0.03507  | 0.390828          | RI          |
| ENSG00000080802 | CNOT4       | 0.028018 | 0.423203          | RI          |
| ENSG00000092199 | HNRNPC      | 0.037872 | -0.38591          | RI          |
| ENSG00000099995 | SF3A1       | 0.028018 | -0.44176          | RI          |
| ENSG00000119314 | PTBP3       | 0.033171 | 0.40685           | RI          |
| ENSG00000122566 | HNRNPA2B1   | 0.041666 | 0.379815          | RI          |
| ENSG00000125970 | RALY        | 0.026872 | -0.46183          | RI          |
| ENSG00000127054 | CPSF3L      | 0.028018 | -0.4304           | RI          |
| ENSG00000136709 | WDR33       | 0.041643 | 0.380642          | RI          |
| ENSG00000147274 | RBMX        | 0.037199 | 0.388232          | RI          |
| ENSG00000149016 | TUT1        | 0.041643 | -0.44476          | RI          |
| ENSG00000153914 | SREK1       | 0.026238 | 0.479294          | RI          |
| ENSG00000174720 | LARP7       | 0.028018 | 0.441012          | RI          |
| ENSG00000197111 | PCBP2       | 0.03349  | -0.39598          | RI          |

**S5 Table. Correlation of Changes in Gene Expression of Splicing Factors and Proportion of RNA Processing Events.**

Log-fold changes in gene expression of 14 splicing factors is correlated to average  $\Delta\Psi$  across three individuals for RI events.
