# Supplementary material for: Environmental perturbations lead to extensive directional shifts in RNA processing
Source: PubMed Central journal article supplement (PMC5667937; doi:10.1371/journal.pgen.1006995), 2017-10-12
Supplement: pgen.1006995.s011.pdf [file pgen.1006995.s011.pdf]

| Transcription Factor | Gene Symbol | BH FDR   | Spearman's $\rho$ | Splice Type |
|----------------------|-------------|----------|-------------------|-------------|
| ENSG0000005513       | SOX8        | 0.030831 | 0.501961          | AFE         |
| ENSG0000005801       | ZNF195      | 0.007605 | -0.40907          | AFE         |
| ENSG0000005889       | ZFX         | 0.003345 | -0.44432          | AFE         |
| ENSG0000007080       | CCDC124     | 0.002938 | 0.448996          | AFE         |
| ENSG0000009307       | CSDE1       | 0.008942 | -0.40056          | AFE         |
| ENSG0000010818       | HIVEP2      | 0.038052 | -0.34782          | AFE         |
| ENSG0000012504       | NR1H4       | 0.042849 | 0.809091          | AFE         |
| ENSG0000012817       | KDM5D       | 0.045894 | 0.38035           | AFE         |
| ENSG0000018869       | ZNF582      | 0.045494 | -0.32619          | AFE         |
| ENSG0000029153       | ARNTL2      | 0.013796 | -0.477            | AFE         |
| ENSG0000029363       | BCLAF1      | 0.008431 | -0.41378          | AFE         |
| ENSG0000049618       | ARID1B      | 0.002465 | -0.51535          | AFE         |
| ENSG0000050344       | NFE2L3      | 0.015417 | -0.37475          | AFE         |
| ENSG0000055609       | KMT2C       | 0.023405 | -0.35314          | AFE         |
| ENSG0000059728       | MXD1        | 0.007176 | -0.41184          | AFE         |
| ENSG0000064933       | PMS1        | 0.015919 | -0.39857          | AFE         |
| ENSG0000064961       | HMG20B      | 0.00087  | 0.529545          | AFE         |
| ENSG0000066827       | ZFAT        | 0.011722 | -0.4347           | AFE         |
| ENSG0000067066       | SP100       | 0.029784 | -0.34067          | AFE         |
| ENSG0000067646       | ZFY         | 0.038455 | -0.388            | AFE         |
| ENSG0000068305       | MEF2A       | 0.028748 | -0.34245          | AFE         |
| ENSG0000070444       | MNT         | 0.024099 | 0.352026          | AFE         |
| ENSG0000071564       | TCF3        | 0.001062 | 0.529317          | AFE         |
| ENSG0000071655       | MBD3        | 0.000249 | 0.556077          | AFE         |
| ENSG0000072310       | SREBF1      | 0.003345 | 0.519896          | AFE         |
| ENSG0000073614       | KDM5A       | 0.049141 | -0.31083          | AFE         |
| ENSG0000074657       | ZNF532      | 0.032216 | -0.3384           | AFE         |
| ENSG0000075407       | ZNF37A      | 0.028599 | 0.420698          | AFE         |
| ENSG0000077463       | SIRT6       | 0.015729 | 0.378564          | AFE         |
| ENSG0000077809       | GTF2I       | 0.001436 | -0.52524          | AFE         |
| ENSG0000078900       | TP73        | 0.00713  | 0.717391          | AFE         |
| ENSG0000079432       | CIC         | 0.001905 | 0.520348          | AFE         |
| ENSG0000080298       | RFX3        | 0.020701 | -0.42354          | AFE         |
| ENSG0000082258       | CCNT2       | 0.002938 | -0.44965          | AFE         |
| ENSG0000083838       | ZNF446      | 0.015997 | 0.443737          | AFE         |
| ENSG0000085274       | MYNN        | 0.026408 | -0.34757          | AFE         |
| ENSG0000085276       | MECOM       | 0.010629 | 0.40234           | AFE         |
| ENSG0000085644       | ZNF213      | 0.01477  | 0.444893          | AFE         |
| ENSG0000086065       | CHMP5       | 0.01942  | -0.3628           | AFE         |
| ENSG0000087510       | TFAP2C      | 0.035417 | 0.797203          | AFE         |
| ENSG0000089902       | RCOR1       | 0.011211 | -0.38909          | AFE         |
| ENSG0000090612       | ZNF268      | 0.028292 | -0.34611          | AFE         |
| ENSG0000092203       | TOX4        | 0.036846 | 0.336626          | AFE         |
| ENSG0000095794       | CREM        | 0.025756 | -0.38082          | AFE         |
| ENSG0000095951       | HIVEP1      | 0.038052 | -0.34524          | AFE         |
| ENSG0000096401       | CDC5L       | 0.003245 | -0.44549          | AFE         |
| ENSG0000099326       | MZF1        | 0.011668 | 0.419113          | AFE         |
| ENSG0000099364       | FBXL19      | 0.001586 | 0.534916          | AFE         |
| ENSG00000100219      | XBP1        | 0.033326 | 0.33436           | AFE         |
| ENSG00000100281      | HMGXB4      | 0.046967 | 0.405822          | AFE         |
| ENSG00000100644      | HIF1A       | 0.043907 | -0.31786          | AFE         |

| Transcription Factor | Gene Symbol | BH FDR   | Spearman's $\rho$ | Splice Type |
|----------------------|-------------|----------|-------------------|-------------|
| ENSG00000100811      | YY1         | 0.001279 | 0.531399          | AFE         |
| ENSG00000100968      | NFATC4      | 0.002465 | 0.552615          | AFE         |
| ENSG00000101126      | ADNP        | 0.010482 | -0.39345          | AFE         |
| ENSG00000101412      | E2F1        | 0.022173 | 0.38517           | AFE         |
| ENSG00000102034      | ELF4        | 0.024559 | -0.36986          | AFE         |
| ENSG00000103199      | ZNF500      | 0.020424 | 0.392277          | AFE         |
| ENSG00000103495      | MAZ         | 0.002932 | 0.451107          | AFE         |
| ENSG00000104064      | GABPB1      | 0.037314 | -0.34949          | AFE         |
| ENSG00000104447      | TRPS1       | 0.048605 | -0.38015          | AFE         |
| ENSG00000105663      | KMT2B       | 0.033912 | 0.36624           | AFE         |
| ENSG00000105698      | USF2        | 0.008328 | 0.451146          | AFE         |
| ENSG00000105722      | ERF         | 0.001351 | 0.486706          | AFE         |
| ENSG00000105732      | ZNF574      | 0.001585 | 0.511275          | AFE         |
| ENSG00000105750      | ZNF85       | 0.041996 | -0.37022          | AFE         |
| ENSG00000105866      | SP4         | 0.042677 | -0.363            | AFE         |
| ENSG00000105967      | TFEC        | 0.023025 | -0.47418          | AFE         |
| ENSG00000108264      | TADA2A      | 0.002091 | -0.49579          | AFE         |
| ENSG00000108509      | CAMTA2      | 0.027316 | 0.370037          | AFE         |
| ENSG00000109381      | ELF2        | 0.038149 | -0.33796          | AFE         |
| ENSG00000109685      | WHSC1       | 0.03288  | 0.3582            | AFE         |
| ENSG00000110693      | SOX6        | 0.028338 | 0.343604          | AFE         |
| ENSG00000112242      | E2F3        | 0.046827 | -0.31401          | AFE         |
| ENSG00000113658      | SMAD5       | 0.031282 | -0.35604          | AFE         |
| ENSG00000114853      | ZBTB47      | 0.008976 | 0.423476          | AFE         |
| ENSG00000115568      | ZNF142      | 0.001062 | 0.582849          | AFE         |
| ENSG00000115816      | CEBPZ       | 0.037385 | -0.32671          | AFE         |
| ENSG00000115966      | ATF2        | 0.034645 | -0.33134          | AFE         |
| ENSG00000116044      | NFE2L2      | 0.012098 | -0.3854           | AFE         |
| ENSG00000116731      | PRDM2       | 0.025096 | -0.39709          | AFE         |
| ENSG00000116809      | ZBTB17      | 0.020715 | 0.394011          | AFE         |
| ENSG00000117010      | ZNF684      | 0.048712 | -0.36344          | AFE         |
| ENSG00000117625      | RCOR3       | 0.020481 | -0.39479          | AFE         |
| ENSG00000117713      | ARID1A      | 0.036708 | -0.37914          | AFE         |
| ENSG00000118217      | ATF6        | 0.009424 | -0.39774          | AFE         |
| ENSG00000118260      | CREB1       | 0.027948 | -0.37966          | AFE         |
| ENSG00000118412      | CASP8AP2    | 0.014896 | -0.37656          | AFE         |
| ENSG00000118620      | ZNF430      | 0.019058 | -0.40625          | AFE         |
| ENSG00000119574      | ZBTB45      | 0.001614 | 0.48575           | AFE         |
| ENSG00000119725      | ZNF410      | 0.004994 | -0.42625          | AFE         |
| ENSG00000120690      | ELF1        | 0.012098 | -0.38553          | AFE         |
| ENSG00000120784      | ZFP30       | 0.04937  | 0.457595          | AFE         |
| ENSG00000121413      | ZSCAN18     | 0.031219 | 0.386984          | AFE         |
| ENSG00000122034      | GTF3A       | 0.044177 | -0.31736          | AFE         |
| ENSG00000123636      | BAZ2B       | 0.003556 | -0.48811          | AFE         |
| ENSG00000123933      | MXD4        | 0.001108 | 0.500937          | AFE         |
| ENSG00000124459      | ZNF45       | 0.002938 | -0.46008          | AFE         |
| ENSG00000125520      | SLC2A4RG    | 0.002938 | 0.460202          | AFE         |
| ENSG00000125817      | CENPB       | 0.008958 | 0.399904          | AFE         |
| ENSG00000125846      | ZNF133      | 0.015074 | -0.37571          | AFE         |
| ENSG00000125850      | OVOL2       | 0.020629 | -0.35873          | AFE         |

| Transcription Factor | Gene Symbol | BH FDR   | Spearman's $\rho$ | Splice Type |
|----------------------|-------------|----------|-------------------|-------------|
| ENSG00000125901      | MRPS26      | 0.013655 | 0.387351          | AFE         |
| ENSG00000126012      | KDM5C       | 0.002938 | 0.461902          | AFE         |
| ENSG00000126456      | IRF3        | 0.002276 | 0.466144          | AFE         |
| ENSG00000126561      | STAT5A      | 0.011964 | 0.462959          | AFE         |
| ENSG00000126603      | GLIS2       | 0.005944 | 0.429916          | AFE         |
| ENSG00000126767      | ELK1        | 0.046827 | 0.31807           | AFE         |
| ENSG00000127081      | ZNF484      | 0.037864 | -0.34586          | AFE         |
| ENSG00000127528      | KLF2        | 0.028055 | 0.38489           | AFE         |
| ENSG00000129071      | MBD4        | 0.004486 | -0.43106          | AFE         |
| ENSG00000129535      | NRL         | 0.003556 | 0.537348          | AFE         |
| ENSG00000129911      | KLF16       | 0.003488 | 0.440371          | AFE         |
| ENSG00000130522      | JUND        | 0.007744 | 0.407972          | AFE         |
| ENSG00000130726      | TRIM28      | 0.033792 | 0.332969          | AFE         |
| ENSG00000130816      | DNMT1       | 0.049141 | 0.339824          | AFE         |
| ENSG00000130856      | ZNF236      | 0.025606 | -0.41286          | AFE         |
| ENSG00000131196      | NFATC1      | 0.04893  | 0.515599          | AFE         |
| ENSG00000131408      | NR1H2       | 0.001585 | 0.480712          | AFE         |
| ENSG00000132005      | RFX1        | 0.020458 | 0.59768           | AFE         |
| ENSG00000132010      | ZNF20       | 0.04937  | -0.33436          | AFE         |
| ENSG00000132749      | MTL5        | 0.037385 | 0.854545          | AFE         |
| ENSG00000133250      | ZNF414      | 0.013137 | 0.435869          | AFE         |
| ENSG00000133794      | ARNTL       | 0.027553 | -0.35239          | AFE         |
| ENSG00000134852      | CLOCK       | 0.034472 | -0.33174          | AFE         |
| ENSG00000135164      | DMTF1       | 0.012622 | -0.38856          | AFE         |
| ENSG00000135457      | TFCP2       | 0.015161 | -0.40642          | AFE         |
| ENSG00000135747      | ZNF670      | 0.020458 | -0.40101          | AFE         |
| ENSG00000136169      | SETDB2      | 0.046392 | -0.34139          | AFE         |
| ENSG00000136997      | MYC         | 0.003345 | 0.442837          | AFE         |
| ENSG00000137309      | HMGA1       | 0.047689 | 0.312937          | AFE         |
| ENSG00000137492      | PRKRIR      | 0.045689 | -0.31535          | AFE         |
| ENSG00000138336      | TET1        | 0.038052 | -0.36374          | AFE         |
| ENSG00000139154      | AEBP2       | 0.012984 | -0.38249          | AFE         |
| ENSG00000139624      | CERS5       | 0.021556 | -0.39228          | AFE         |
| ENSG00000140262      | TCF12       | 0.035417 | -0.3301           | AFE         |
| ENSG00000141510      | TP53        | 0.020028 | 0.360803          | AFE         |
| ENSG00000141644      | MBD1        | 0.007176 | 0.436023          | AFE         |
| ENSG00000141646      | SMAD4       | 0.007176 | -0.45472          | AFE         |
| ENSG00000142409      | ZNF787      | 0.000582 | 0.523847          | AFE         |
| ENSG00000143178      | TBX19       | 0.048029 | -0.36123          | AFE         |
| ENSG00000143373      | ZNF687      | 0.004013 | 0.483531          | AFE         |
| ENSG00000143799      | PARP1       | 0.019722 | 0.36883           | AFE         |
| ENSG00000144366      | GULP1       | 0.022509 | 0.572875          | AFE         |
| ENSG00000144485      | HES6        | 0.005076 | 0.603841          | AFE         |
| ENSG00000146587      | RBAK        | 0.00713  | -0.4124           | AFE         |
| ENSG00000147124      | ZNF41       | 0.020285 | -0.36673          | AFE         |
| ENSG00000148200      | NR6A1       | 0.019666 | -0.46485          | AFE         |
| ENSG00000149050      | ZNF214      | 0.038835 | -0.61299          | AFE         |
| ENSG00000149922      | TBX6        | 0.013655 | 0.525516          | AFE         |
| ENSG00000151612      | ZNF827      | 0.027955 | 0.407987          | AFE         |
| ENSG00000151702      | FLI1        | 0.020772 | 0.423312          | AFE         |
| ENSG00000152443      | ZNF776      | 0.033792 | -0.3537           | AFE         |

| Transcription Factor | Gene Symbol | BH FDR   | Spearman's $\rho$ | Splice Type |
|----------------------|-------------|----------|-------------------|-------------|
| ENSG00000152926      | ZNF117      | 0.044177 | -0.33692          | AFE         |
| ENSG00000154655      | L3MBTL4     | 0.013827 | -0.48647          | AFE         |
| ENSG00000154832      | CXXC1       | 0.007605 | 0.451504          | AFE         |
| ENSG00000156469      | MTERFD1     | 0.048712 | -0.34076          | AFE         |
| ENSG00000156853      | ZNF689      | 0.019386 | 0.399277          | AFE         |
| ENSG00000158805      | ZNF276      | 0.019976 | 0.426639          | AFE         |
| ENSG00000159588      | CCDC17      | 0.033792 | 0.463227          | AFE         |
| ENSG00000159905      | ZNF221      | 0.045894 | -0.38753          | AFE         |
| ENSG00000159917      | ZNF235      | 0.011509 | -0.4293           | AFE         |
| ENSG00000160113      | NR2F6       | 0.000353 | 0.58217           | AFE         |
| ENSG00000160199      | PKNOX1      | 0.027948 | -0.3451           | AFE         |
| ENSG00000160336      | ZNF761      | 0.003952 | -0.43562          | AFE         |
| ENSG00000160352      | ZNF714      | 0.036936 | -0.37815          | AFE         |
| ENSG00000160908      | ZNF394      | 0.002465 | 0.497584          | AFE         |
| ENSG00000161298      | ZNF382      | 0.033326 | 0.454339          | AFE         |
| ENSG00000162086      | ZNF75A      | 0.028642 | -0.38295          | AFE         |
| ENSG00000162613      | FUBP1       | 0.028835 | -0.36831          | AFE         |
| ENSG00000162714      | ZNF496      | 0.028918 | 0.391245          | AFE         |
| ENSG00000162924      | REL         | 0.004263 | -0.47423          | AFE         |
| ENSG00000163795      | ZNF513      | 0.001279 | 0.534307          | AFE         |
| ENSG00000163939      | PBRM1       | 0.010997 | -0.39117          | AFE         |
| ENSG00000165156      | ZHX1        | 0.042849 | -0.35141          | AFE         |
| ENSG00000165259      | HDX         | 0.043361 | -0.39527          | AFE         |
| ENSG00000165462      | PHOX2A      | 0.036729 | 0.721429          | AFE         |
| ENSG00000165655      | ZNF503      | 0.046491 | 0.354646          | AFE         |
| ENSG00000166188      | ZNF319      | 0.028437 | 0.377692          | AFE         |
| ENSG00000166478      | ZNF143      | 0.028055 | -0.34891          | AFE         |
| ENSG00000166704      | ZNF606      | 0.007604 | 0.550024          | AFE         |
| ENSG00000166888      | STAT6       | 0.02597  | 0.348397          | AFE         |
| ENSG00000167232      | ZNF91       | 0.007145 | -0.41727          | AFE         |
| ENSG00000167380      | ZNF226      | 0.036154 | -0.329            | AFE         |
| ENSG00000167384      | ZNF180      | 0.002465 | -0.48598          | AFE         |
| ENSG00000167394      | ZNF668      | 0.001614 | 0.491488          | AFE         |
| ENSG00000167491      | GATAD2A     | 0.008942 | 0.400448          | AFE         |
| ENSG00000167548      | KMT2D       | 0.009982 | 0.450831          | AFE         |
| ENSG00000167625      | ZNF526      | 0.011895 | 0.388664          | AFE         |
| ENSG00000167685      | ZNF444      | 0.00387  | 0.481224          | AFE         |
| ENSG00000167967      | E4F1        | 0.000206 | 0.566237          | AFE         |
| ENSG00000168036      | CTNNB1      | 0.036708 | -0.32837          | AFE         |
| ENSG00000168286      | THAP11      | 0.043381 | 0.33564           | AFE         |
| ENSG00000168813      | ZNF507      | 0.048712 | -0.31175          | AFE         |
| ENSG00000169155      | ZBTB43      | 0.019644 | -0.37402          | AFE         |
| ENSG00000169375      | SIN3A       | 0.028642 | -0.36119          | AFE         |
| ENSG00000169554      | ZEB2        | 0.044629 | -0.4052           | AFE         |
| ENSG00000169951      | ZNF764      | 0.032907 | 0.415242          | AFE         |
| ENSG00000169957      | ZNF768      | 0.001092 | 0.534257          | AFE         |
| ENSG00000170265      | ZNF282      | 0.001278 | 0.544019          | AFE         |
| ENSG00000170653      | ATF7        | 0.021904 | -0.35606          | AFE         |
| ENSG00000170949      | ZNF160      | 0.024244 | -0.35157          | AFE         |
| ENSG00000171163      | ZNF692      | 0.000742 | 0.601395          | AFE         |
| ENSG00000171169      | NAIF1       | 0.007605 | 0.480789          | AFE         |
| ENSG00000171223      | JUNB        | 0.008431 | 0.413755          | AFE         |

| Transcription Factor | Gene Symbol | BH FDR   | Spearman's $\rho$ | Splice Type |
|----------------------|-------------|----------|-------------------|-------------|
| ENSG00000171425      | ZNF581      | 0.000106 | 0.569626          | AFE         |
| ENSG00000171466      | ZNF562      | 0.005361 | -0.44815          | AFE         |
| ENSG00000171574      | ZNF584      | 0.028642 | 0.356417          | AFE         |
| ENSG00000171735      | CAMTA1      | 0.001959 | -0.52587          | AFE         |
| ENSG00000172262      | ZNF131      | 0.031168 | -0.34473          | AFE         |
| ENSG00000172845      | SP3         | 0.001339 | -0.4873           | AFE         |
| ENSG00000173041      | ZNF680      | 0.00957  | -0.46382          | AFE         |
| ENSG00000173120      | KDM2A       | 0.013717 | -0.39467          | AFE         |
| ENSG00000173153      | ESRRA       | 0.000467 | 0.554279          | AFE         |
| ENSG00000173451      | THAP2       | 0.033424 | 0.334221          | AFE         |
| ENSG00000173917      | HOXB2       | 0.007604 | 0.477639          | AFE         |
| ENSG00000174197      | MGA         | 0.003245 | -0.51799          | AFE         |
| ENSG00000174282      | ZBTB4       | 0.020028 | 0.360866          | AFE         |
| ENSG00000174586      | ZNF497      | 0.027463 | 0.399133          | AFE         |
| ENSG00000174652      | ZNF266      | 0.038052 | 0.388961          | AFE         |
| ENSG00000174796      | THAP6       | 0.011665 | 0.449003          | AFE         |
| ENSG00000175105      | ZNF654      | 0.027553 | -0.34574          | AFE         |
| ENSG00000175213      | ZNF408      | 0.019817 | 0.394703          | AFE         |
| ENSG00000175387      | SMAD2       | 0.031158 | -0.33836          | AFE         |
| ENSG00000175467      | SART1       | 9.68E-05 | 0.584687          | AFE         |
| ENSG00000175787      | ZNF169      | 0.011211 | -0.43706          | AFE         |
| ENSG00000176371      | ZSCAN2      | 0.018119 | 0.497082          | AFE         |
| ENSG00000176946      | THAP4       | 0.020028 | 0.360752          | AFE         |
| ENSG00000177030      | DEAF1       | 0.005978 | 0.443874          | AFE         |
| ENSG00000177045      | SIX5        | 0.013796 | 0.43331           | AFE         |
| ENSG00000177426      | TGIF1       | 0.044484 | 0.427941          | AFE         |
| ENSG00000177732      | SOX12       | 0.000742 | 0.535866          | AFE         |
| ENSG00000178338      | ZNF354B     | 0.04959  | -0.3614           | AFE         |
| ENSG00000178951      | ZBTB7A      | 0.000106 | 0.566907          | AFE         |
| ENSG00000179111      | HES7        | 0.015074 | 0.584274          | AFE         |
| ENSG00000179195      | ZNF664      | 0.04937  | 0.385469          | AFE         |
| ENSG00000179588      | ZFPM1       | 0.033326 | 0.334423          | AFE         |
| ENSG00000179627      | ZBTB42      | 0.017455 | 0.455676          | AFE         |
| ENSG00000179922      | ZNF784      | 0.024667 | 0.429929          | AFE         |
| ENSG00000179965      | ZNF771      | 0.046814 | 0.346097          | AFE         |
| ENSG00000181135      | ZNF707      | 0.018867 | 0.472824          | AFE         |
| ENSG00000181315      | ZNF322      | 0.033431 | -0.36782          | AFE         |
| ENSG00000181666      | HKR1        | 0.008782 | -0.45726          | AFE         |
| ENSG00000181827      | RFX7        | 0.030573 | -0.33935          | AFE         |
| ENSG00000182141      | ZNF708      | 0.040885 | -0.3281           | AFE         |
| ENSG00000182158      | CREB3L2     | 0.01974  | 0.371136          | AFE         |
| ENSG00000182979      | MTA1        | 0.000992 | 0.516757          | AFE         |
| ENSG00000184436      | THAP7       | 0.00484  | 0.472122          | AFE         |
| ENSG00000184517      | ZFP1        | 0.002276 | -0.52085          | AFE         |
| ENSG00000184635      | ZNF93       | 0.04893  | -0.35667          | AFE         |
| ENSG00000184677      | ZBTB40      | 0.041162 | -0.32996          | AFE         |
| ENSG00000185024      | BRF1        | 2.72E-05 | 0.673735          | AFE         |
| ENSG00000185122      | HSF1        | 0.000306 | 0.538807          | AFE         |
| ENSG00000185129      | PURA        | 0.018421 | 0.519353          | AFE         |
| ENSG00000185252      | ZNF74       | 0.014909 | 0.440241          | AFE         |

| Transcription Factor | Gene Symbol | BH FDR   | Spearman's $\rho$ | Splice Type |
|----------------------|-------------|----------|-------------------|-------------|
| ENSG00000185513      | L3MBTL1     | 0.010482 | 0.636563          | AFE         |
| ENSG00000185668      | POU3F1      | 0.004044 | 0.623681          | AFE         |
| ENSG00000185730      | ZNF696      | 0.009369 | 0.453965          | AFE         |
| ENSG00000185947      | ZNF267      | 0.011479 | -0.40328          | AFE         |
| ENSG00000186017      | ZNF566      | 0.047551 | -0.3531           | AFE         |
| ENSG00000187098      | MITF        | 0.025567 | -0.44955          | AFE         |
| ENSG00000188290      | HES4        | 0.006995 | 0.486093          | AFE         |
| ENSG00000188994      | ZNF292      | 0.012281 | -0.44974          | AFE         |
| ENSG00000189042      | ZNF567      | 0.033877 | -0.39072          | AFE         |
| ENSG00000189079      | ARID2       | 0.042296 | -0.31998          | AFE         |
| ENSG00000189144      | ZNF573      | 0.016848 | -0.42669          | AFE         |
| ENSG00000196150      | ZNF250      | 0.047422 | 0.317441          | AFE         |
| ENSG00000196233      | LCOR        | 0.044066 | -0.33264          | AFE         |
| ENSG00000196247      | ZNF107      | 0.012259 | -0.39209          | AFE         |
| ENSG00000196268      | ZNF493      | 0.025606 | -0.38993          | AFE         |
| ENSG00000196378      | ZNF34       | 0.029598 | 0.458571          | AFE         |
| ENSG00000196417      | ZNF765      | 0.039728 | 0.640351          | AFE         |
| ENSG00000196418      | ZNF124      | 0.04225  | -0.34481          | AFE         |
| ENSG00000196453      | ZNF777      | 0.011211 | 0.396415          | AFE         |
| ENSG00000196456      | ZNF775      | 0.016112 | 0.372399          | AFE         |
| ENSG00000196498      | NCOR2       | 0.01005  | 0.440091          | AFE         |
| ENSG00000196591      | HDAC2       | 0.020028 | -0.36074          | AFE         |
| ENSG00000196646      | ZNF136      | 0.037508 | -0.36802          | AFE         |
| ENSG00000196705      | ZNF431      | 0.02772  | -0.35915          | AFE         |
| ENSG00000196757      | ZNF700      | 0.047422 | -0.31347          | AFE         |
| ENSG00000196826      | ZNF709      | 0.046827 | -0.31804          | AFE         |
| ENSG00000196843      | ARID5A      | 0.034828 | 0.358989          | AFE         |
| ENSG00000197008      | ZNF138      | 0.031158 | -0.37807          | AFE         |
| ENSG00000197020      | ZNF100      | 0.006398 | -0.47779          | AFE         |
| ENSG00000197050      | ZNF420      | 0.038052 | -0.36109          | AFE         |
| ENSG00000197054      | ZNF763      | 0.048148 | -0.31232          | AFE         |
| ENSG00000197362      | ZNF786      | 0.026047 | 0.369447          | AFE         |
| ENSG00000197372      | ZNF675      | 0.002298 | -0.50532          | AFE         |
| ENSG00000197483      | ZNF628      | 0.040307 | 0.382229          | AFE         |
| ENSG00000197497      | ZNF665      | 0.036863 | 0.488196          | AFE         |
| ENSG00000197608      | ZNF841      | 0.03285  | -0.33522          | AFE         |
| ENSG00000197779      | ZNF81       | 0.008616 | -0.44462          | AFE         |
| ENSG00000197782      | ZNF780A     | 0.004557 | -0.43504          | AFE         |
| ENSG00000198026      | ZNF335      | 0.016382 | 0.371754          | AFE         |
| ENSG00000198160      | MIER1       | 0.00812  | -0.40613          | AFE         |
| ENSG00000198169      | ZNF251      | 0.042695 | 0.381947          | AFE         |
| ENSG00000198176      | TFDP1       | 0.00433  | 0.480609          | AFE         |
| ENSG00000198182      | ZNF607      | 0.002817 | -0.54309          | AFE         |
| ENSG00000198466      | ZNF587      | 0.033675 | -0.33383          | AFE         |
| ENSG00000198517      | MAFK        | 0.006398 | 0.432469          | AFE         |
| ENSG00000198521      | ZNF43       | 0.010482 | -0.41954          | AFE         |
| ENSG00000198554      | WDHD1       | 0.049141 | -0.3168           | AFE         |
| ENSG00000198815      | FOXJ3       | 0.037839 | -0.38613          | AFE         |
| ENSG00000198816      | ZNF358      | 0.028748 | 0.391835          | AFE         |
| ENSG00000198911      | SREBF2      | 0.03358  | 0.349606          | AFE         |

| Transcription Factor | Gene Symbol  | BH FDR   | Spearman's $\rho$ | Splice Type |
|----------------------|--------------|----------|-------------------|-------------|
| ENSG00000204231      | RXRB         | 0.044904 | 0.336019          | AFE         |
| ENSG00000204304      | PBX2         | 0.033729 | 0.356597          | AFE         |
| ENSG00000204514      | ZNF814       | 0.017669 | -0.37064          | AFE         |
| ENSG00000204519      | ZNF551       | 0.018119 | 0.425798          | AFE         |
| ENSG00000204859      | ZBTB48       | 0.001331 | 0.540091          | AFE         |
| ENSG00000204946      | ZNF783       | 0.037629 | 0.380009          | AFE         |
| ENSG00000205903      | ZNF316       | 0.001279 | 0.497756          | AFE         |
| ENSG00000213015      | ZNF580       | 0.000249 | 0.558377          | AFE         |
| ENSG00000213297      | ZNF625-ZNF20 | 0.049141 | -0.32323          | AFE         |
| ENSG00000213347      | MXD3         | 0.029827 | 0.340544          | AFE         |
| ENSG00000214022      | REPIN1       | 0.002427 | 0.486217          | AFE         |
| ENSG00000215421      | ZNF407       | 0.0298   | 0.613636          | AFE         |
| ENSG00000218891      | ZNF579       | 0.006529 | 0.44006           | AFE         |
| ENSG00000225614      | ZNF469       | 0.022173 | 0.403079          | AFE         |
| ENSG00000229809      | ZNF688       | 0.011085 | 0.539212          | AFE         |
| ENSG00000234444      | ZNF736       | 0.013363 | -0.38812          | AFE         |
| ENSG00000236609      | ZNF853       | 0.018577 | 0.578889          | AFE         |
| ENSG00000242802      | AP5Z1        | 0.014896 | 0.399207          | AFE         |
| ENSG00000243943      | ZNF512       | 0.001139 | -0.49642          | AFE         |
| ENSG00000244405      | ETV5         | 0.035739 | -0.3975           | AFE         |
| ENSG00000249459      | ZNF286B      | 0.018236 | 0.526675          | AFE         |
| ENSG00000249709      | ZNF564       | 0.042849 | -0.33646          | AFE         |
| ENSG00000250571      | GLI4         | 0.00386  | 0.543777          | AFE         |
| ENSG00000251369      | ZNF550       | 0.036936 | 0.431869          | AFE         |

**S6 Table. Correlation of Changes in Gene Expression of Transcription Factors and Proportion of RNA Processing Events.**

Log-fold changes in gene expression of 328 transcription factors is correlated to average  $\Delta\Psi$  across three individuals for AFE events.
