# Supplementary material for: Environmental perturbations lead to extensive directional shifts in RNA processing
Source: PLOS journal article supplement (doi:10.1371/journal.pgen.1006995), 2017-10-12
Supplement: S3 (10.1371/journal.pgen.1006995.s003) [file journal.pgen.1006995.s003]

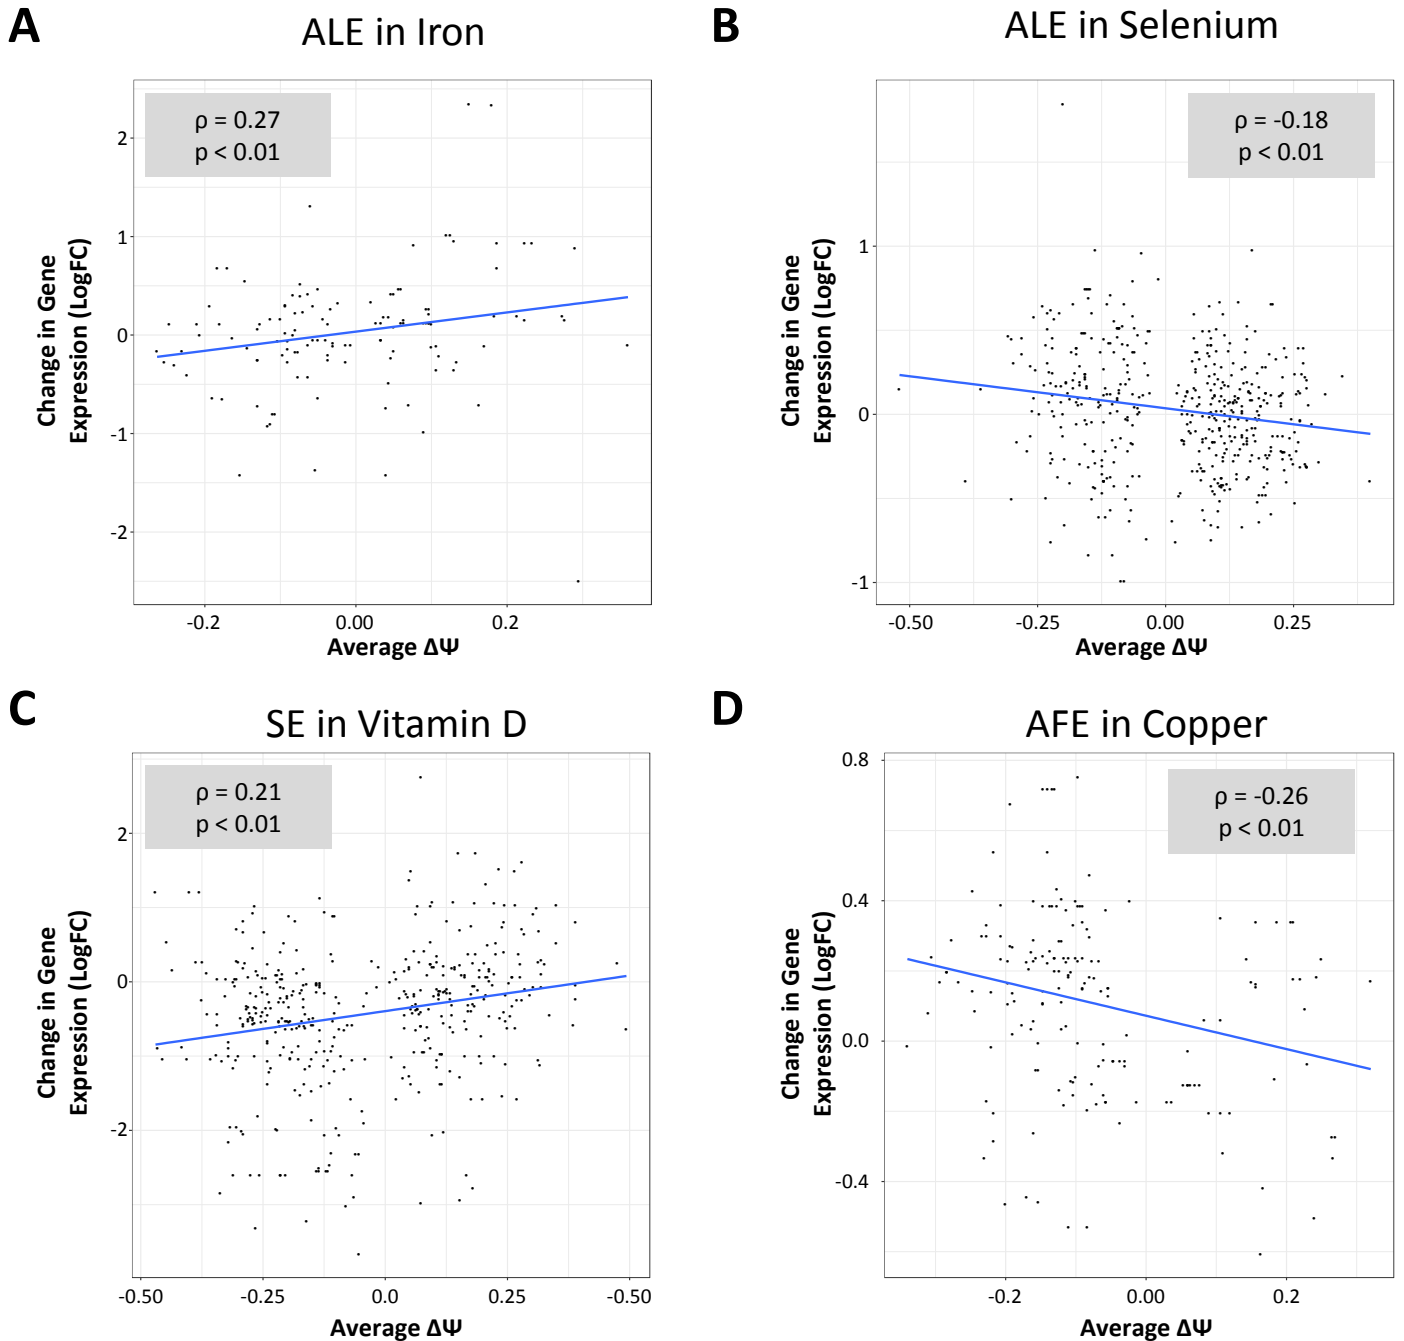

**S3 Fig. Examples of Correlation between Differential Gene Expression and Differential RNA Processing.**

These graphs show the correlation of gene expression changes and significant RNA processing shifts (using  $\Delta\Psi$ ) following various treatments. Each point represents one RNA processing shift in a given cell type, with treatment indicated above the graph. Specifically, A is a graph for genes with shifts in ALE usage following iron, B) shows genes with shifts in ALE following selenium, C) shows genes with shifts in SE following vitamin D exposure and D) shows genes with shifts in AFE usage following treatment with copper.
